# Supplementary material for: NFATc1 supports imiquimod-induced skin inflammation by suppressing IL-10 synthesis in B cells
Source: PubMed Central journal article supplement (PMC4894959; doi:10.1038/ncomms11724), 2016-05-25
Supplement: ncomms11724-s1.pdf [file ncomms11724-s1.pdf]

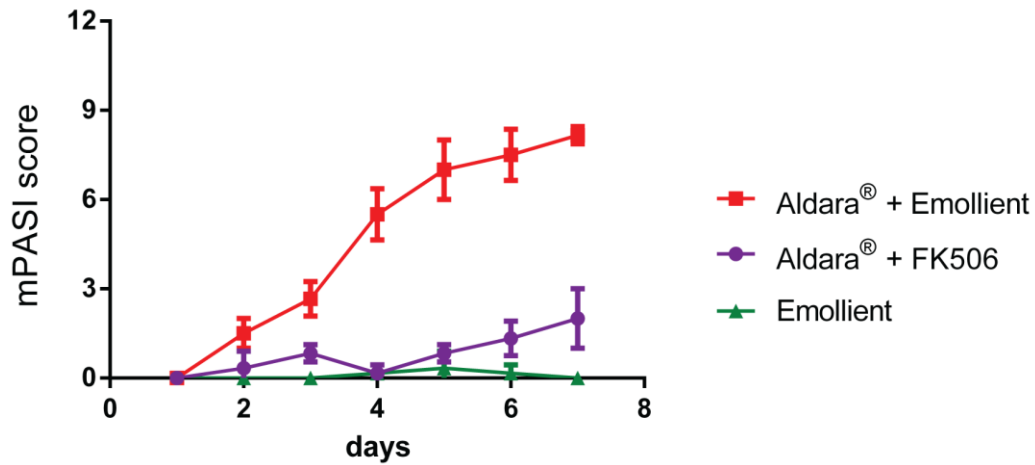

**Supplementary Figure 1.** FK506 suppresses Aldara®-induced skin inflammation. WT mice were shaved at the upper back and treated epicutaneously for 7 d with emollient cream alone, with Aldara® and emollient cream, or with Aldara® and Protopic® cream (Astellas; containing 0.1% FK506). In each of 3 assays, 3 mice were treated.

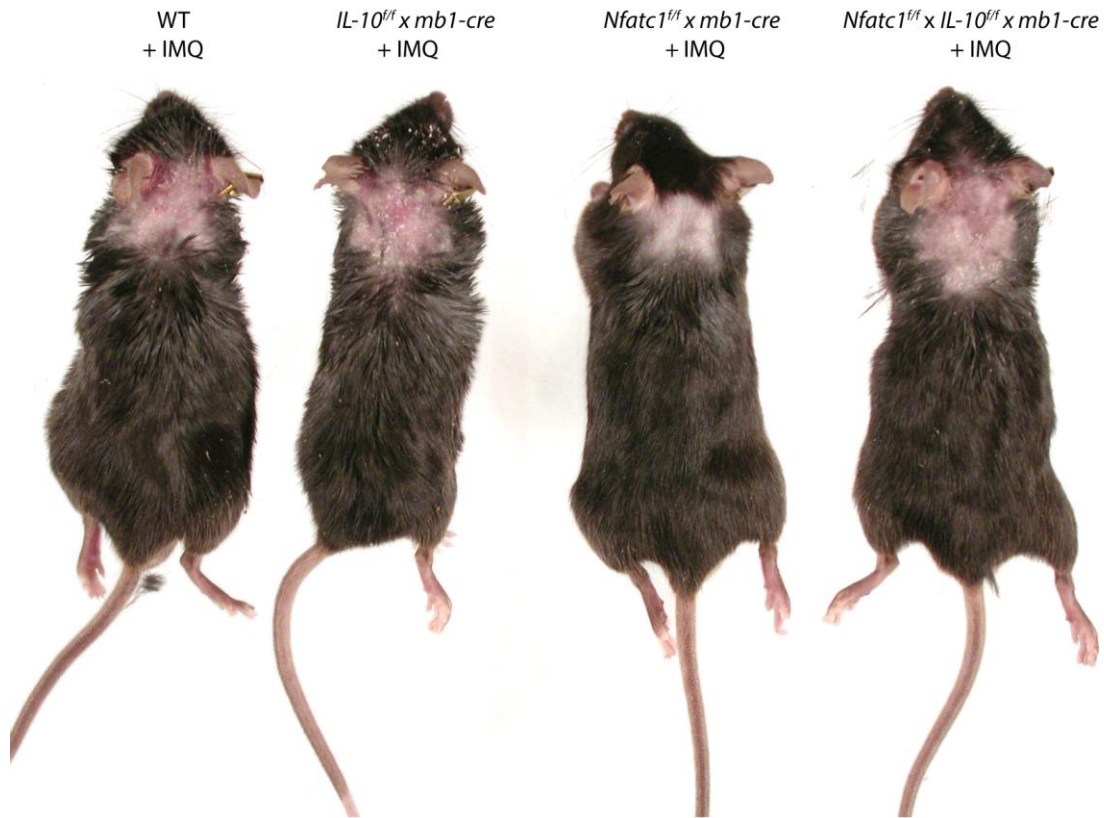

**Supplementary Figure 2.** IL-10 ablation abrogates the effect of NFATc1 inactivation on Aldara<sup>®</sup>-induced skin inflammation. WT mice or mice bearing IL-10-deficient (*IL10<sup>ff</sup>* x *mb1-cre*), NFATc1-deficient (*Nfatc1<sup>ff</sup>* x *mb1-cre*) or IL-10- and NFATc1-deficient B cells (*Nfatc1<sup>ff</sup>* x *IL10<sup>ff</sup>* x *mb1-cre*) were shaved at the upper back and treated epicutaneously with Aldara<sup>®</sup> cream for 7 d.

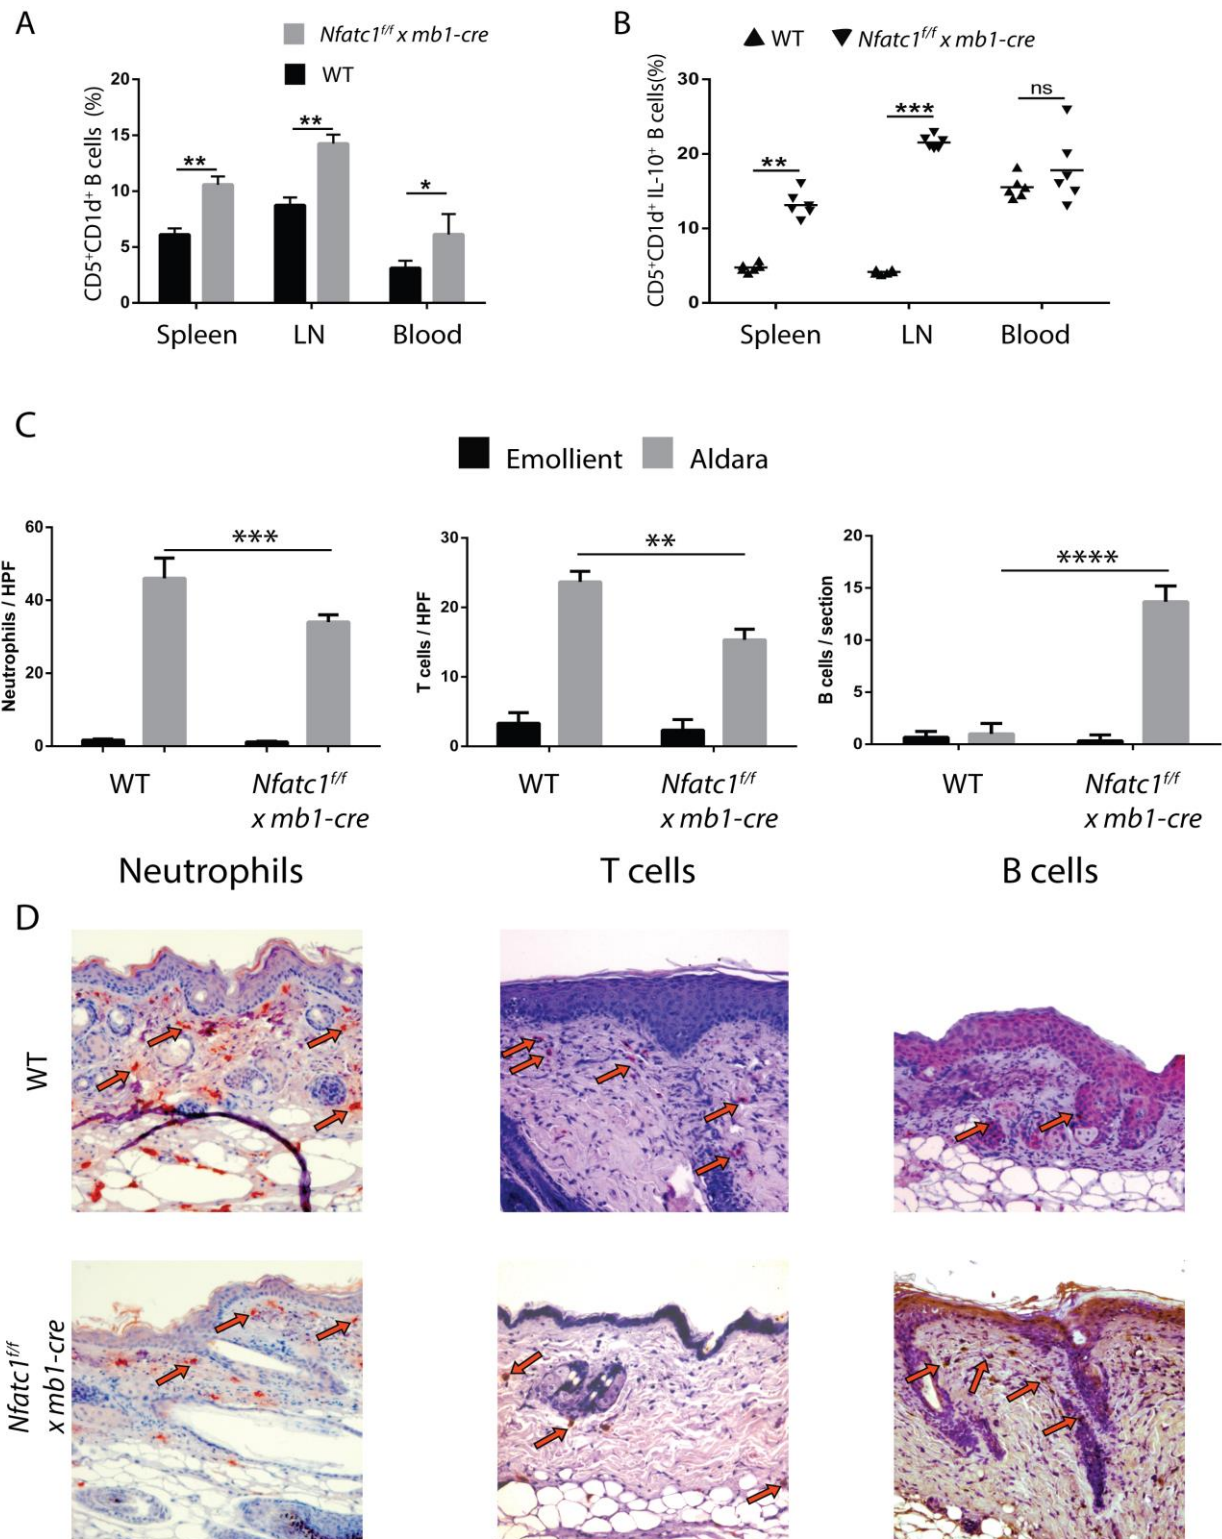

**Supplementary Figure 3.** Aldara<sup>®</sup> treatment leads to an increase in the number of B10 cells in spleen, lymph nodes (LN) and blood (A+B), and of infiltration of B cells into the skin (C+D). In (A) the proportion of CD5<sup>+</sup>CD1d<sup>+</sup> B cells in preparations of

splenic, LN and blood B cells from WT and NFATc1-deficient mice is shown. In (B) the expression of IL-10 in CD5<sup>+</sup>CD1d<sup>+</sup> B cells is presented. (C+D) Paraffin embedded sections of skin from WT and *Nfatc1<sup>fl/fl</sup> x mb1-cre* mice treated either with emollient or with Aldara<sup>®</sup> were stained with H&E or immunolabeled with Abs raised against Gr-1 (for neutrophils/granulocytes), CD3 (T cells) or B220 (B cells). Arrows indicate cells stained by Abs. In each set of experiments, skin sections of three mice were prepared, and – for neutrophils and T cells - the cells in 10 high power fields (HPF) were counted. For B cells, cells from whole sections were counted. For A-C, two-tailed unpaired Student's t-test was used. Data are shown as means ± SEM.

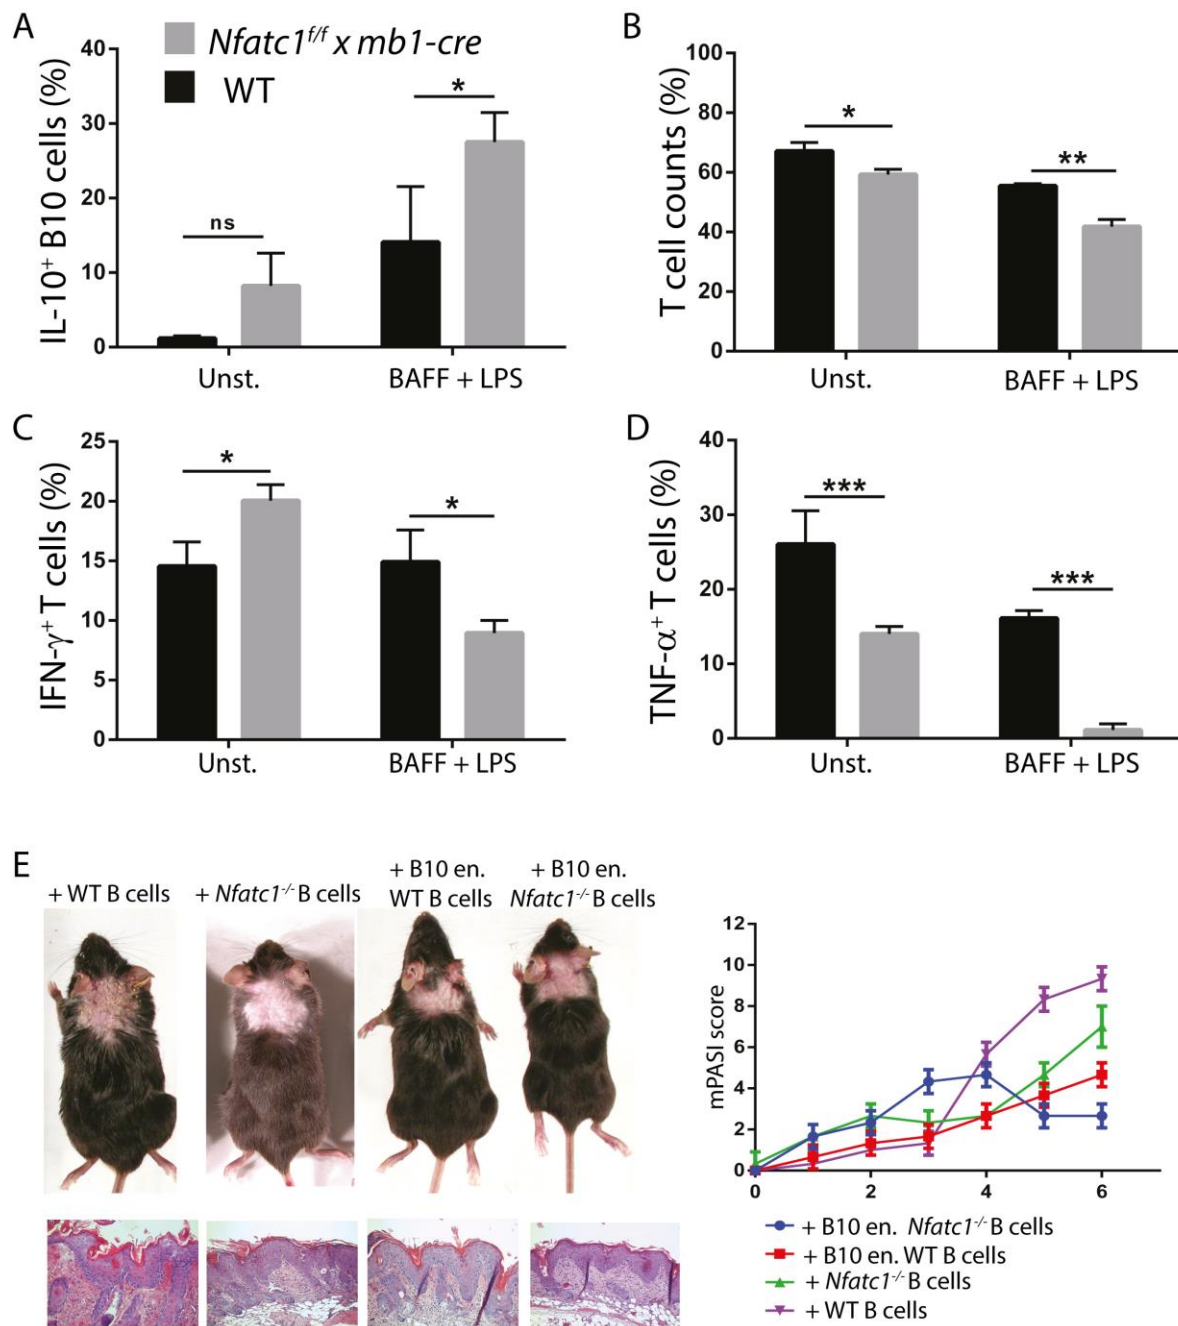

**Supplementary Figure 4** Enriched B10 cells suppress Aldara<sup>®</sup>-mediated skin inflammation as well as proliferation and inflammatory cytokine expression of T cells. (A) Enrichment of IL-10-producing B cells upon treatment with LPS and BAFF for 3 d. (B-D) Effect of enriched B10 cells on T cell proliferation (B), on the production of IFN- $\gamma$  (C) and TNF- $\alpha$  (D) by CD4<sup>+</sup>T cells. 5x10<sup>6</sup> B cells containing enriched B10 cells (as

prepared in [A]) were injected intraperitoneally into mice. 48 h later, the T cells of those mice were analysed. (E) Adoptive transfer of enriched B10 cells ameliorates skin inflammation by Aldara<sup>®</sup>.  $5 \times 10^6$  freshly prepared splenic B cells or enriched B10 cells were adoptively transferred into WT mice, and their mPASI was determined. Shown are mice and H & E-stained skin sections after topical Aldara<sup>®</sup>-application for 6 d. For A-D, two-tailed unpaired Student's t-test was used. Data are shown as means  $\pm$  SEM.

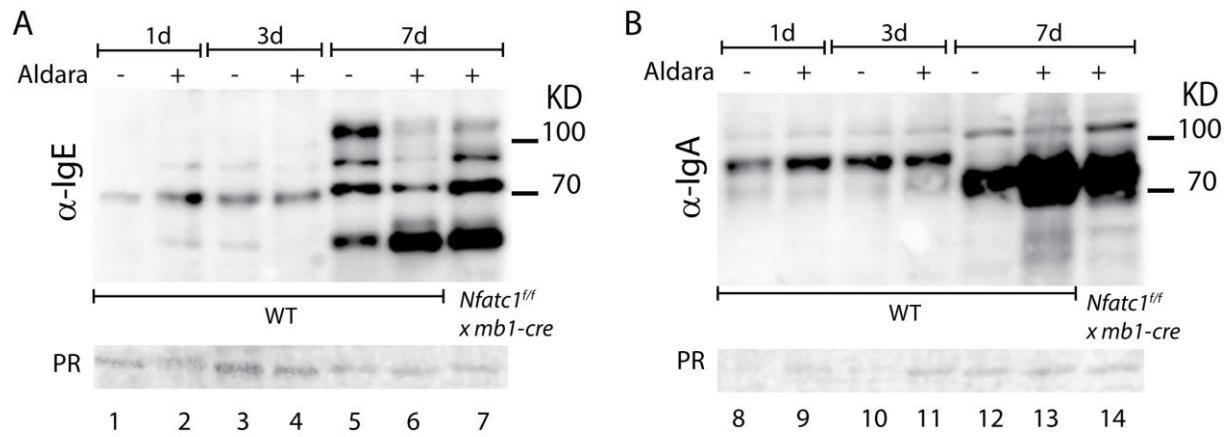

**Supplementary Figure 5.** Aldara<sup>®</sup> treatment leads to differentiation of splenic B cells to Ab-producing cells. In (A) and (B), mice were treated with Aldara<sup>®</sup> (+) or emollient cream (-) for 1, 3 or 7 d. Their splenic B cells were isolated, whole protein extracts prepared and immunoblotted with Abs raised against murine IgE (lanes 1-7) or IgA (8-14). PR, ponceau red.

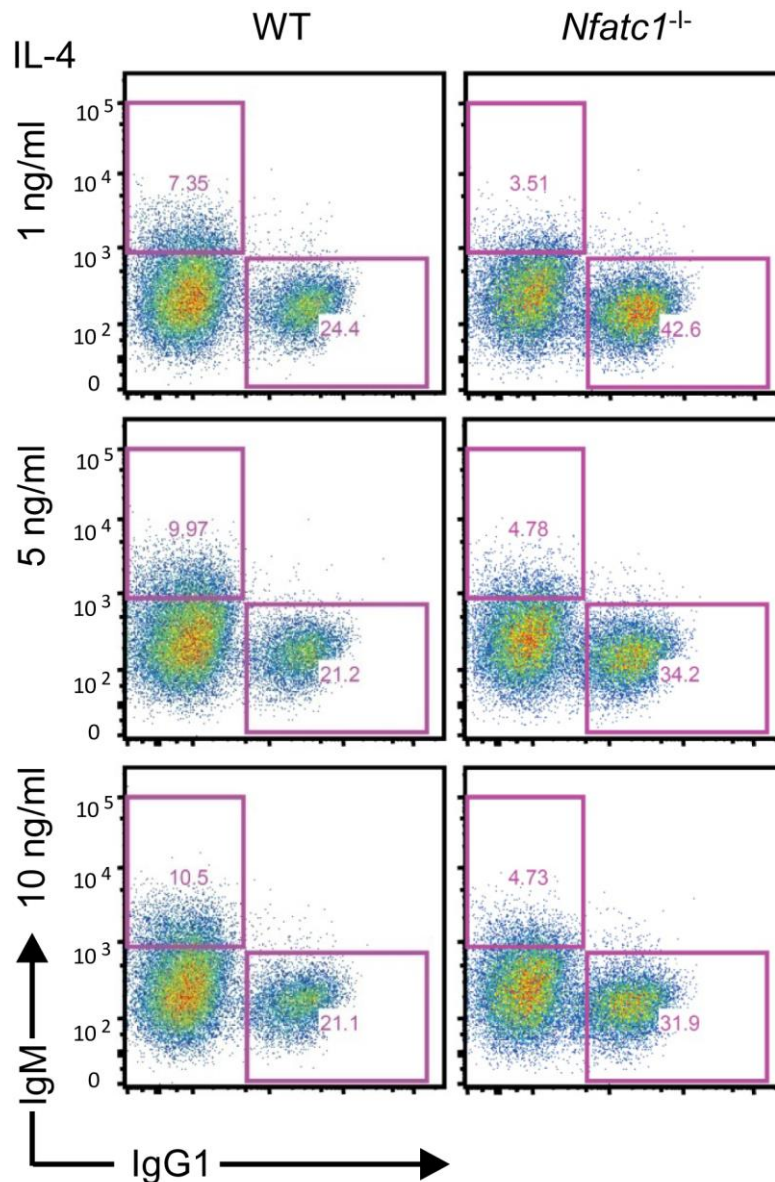

**Supplementary Figure 6.** NFATc1 ablation supports the differentiation of splenic B cells to IgG1-producing cells *in vitro*. Freshly prepared splenic B cells from WT and *Nfatc1*<sup>*fl/fl*</sup> *x mb1-cre* mice were cultured for 4 d on 3T3 feeder layer cells expressing CD40L and BAFF<sup>1</sup> in the presence of IL-4 as indicated. The expression of Ig proteins was determined by flow cytometry.



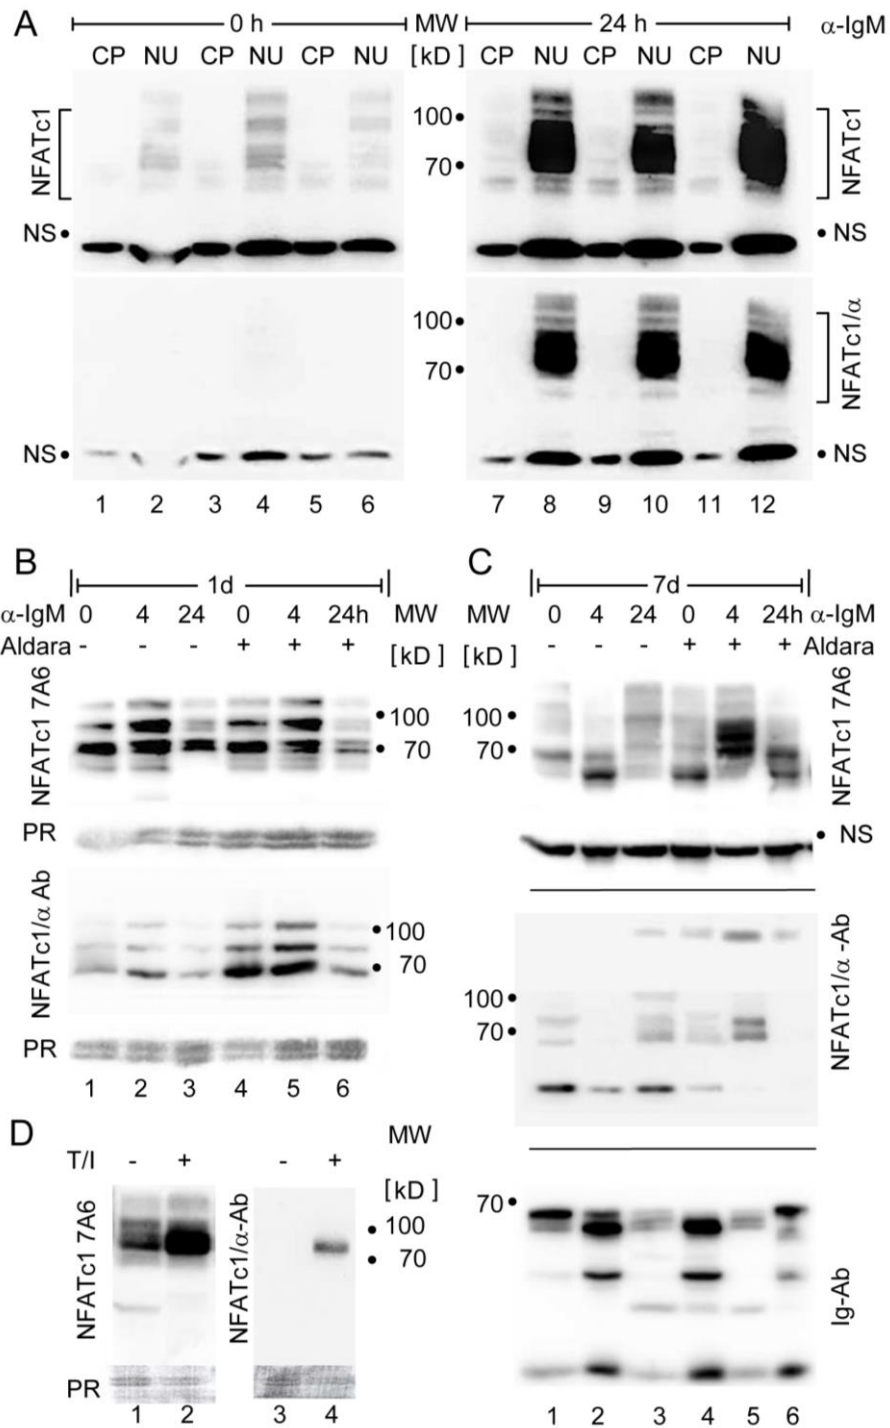

**Supplementary Figure 7.** Induction of nuclear NFATc1/α in splenic B cells and its suppression by Aldara<sup>®</sup> treatment of mice. (A) Splenic B cells derived after treatment with Aldara<sup>®</sup> from young WT mice (6 weeks of age: lanes 1+2 and 7+8), older mice (12 months of age: lanes 3+4 and 9+10) or very old mice (16 months of age: lanes

5+6 and 11+12) were left untreated (0 h), or were stimulated by 10  $\mu\text{g/ml}$   $\alpha\text{IgM}$  for 24 h. Their cytoplasmic and nuclear proteins were isolated and immunoblotted with Abs against NFATc1 (top) or NFATc1/ $\alpha$  (bottom). (B+C) Immunoblots of whole cell protein of splenic B cells obtained from mice treated with Aldara<sup>®</sup> (+) or emollient cream (-) for 1 or 7 d. Blots were probed with NFATc1 (7A6) mAb, the NFATc1 $\alpha$ -peptide Ab or an Ab directed against murine Ig as indicated. NS, non-specific bands. (D) Immunoblots of whole cell protein of splenic B cells from mice treated with Aldara<sup>®</sup> for 7d. Cells were left untreated (-) or treated for 24 h by TPA and ionomycin (+, T/I).

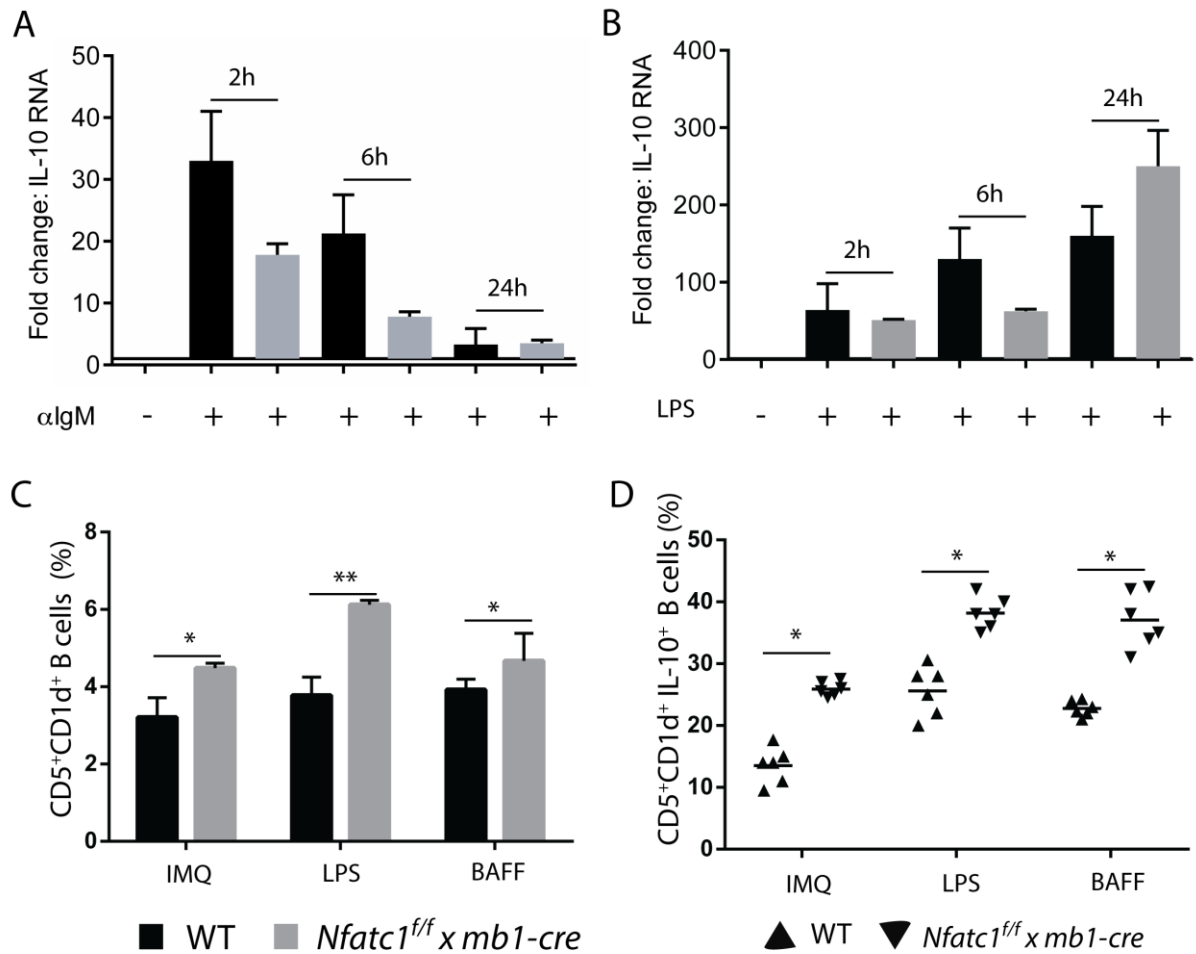

**Supplementary Figure 8.** Induction of IL-10 RNA in WT and NFATc1-deficient splenic B cells by 10  $\mu$ g/ml  $\alpha$ IgM (A) or LPS (B) for 2-24 h *in vitro*. IL-10 RNA was quantified by RT PCR. In (C) and (D), the effect of IMQ, LPS or BAFF treatment of splenic B cells for 48 h on the occurrence of CD5<sup>+</sup>CD1d<sup>+</sup> B cells among splenic B cells (C) and the expression of IL-10 in CD5<sup>+</sup>CD1d<sup>+</sup> B cells (D) was measured by flow cytometry. Data are shown as means  $\pm$  SEM and two-tailed unpaired Student's t-test was used for statistical analysis.

A

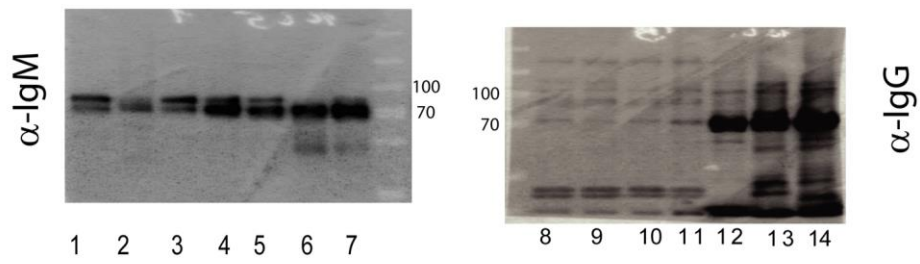

B

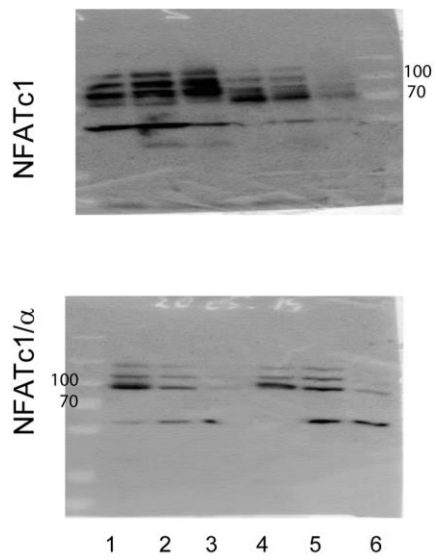

C

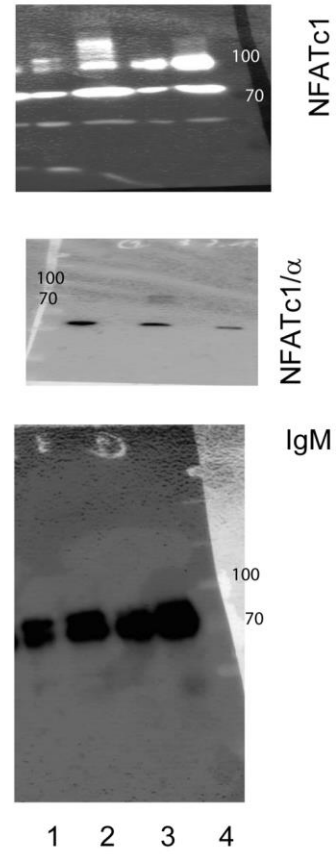

**Supplementary Figure 9.** Uncropped data for Figure 4.

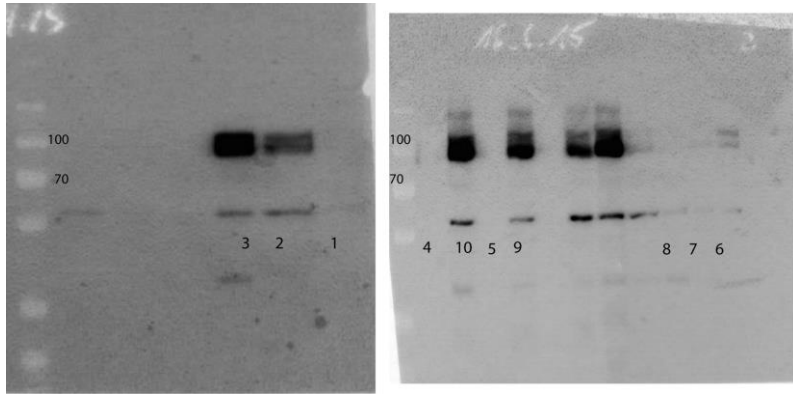

**Supplementary Figure 10.** Uncropped data for Figure 5C.

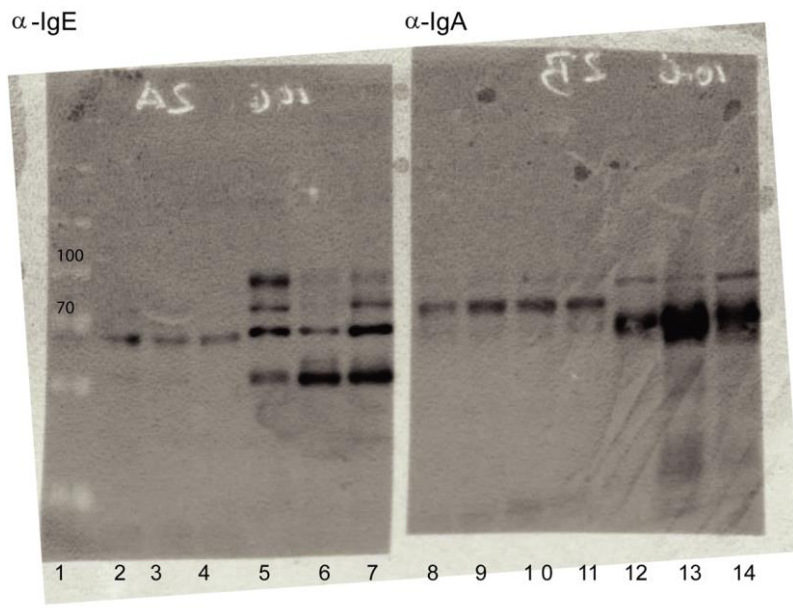

**Supplementary Figure 11.** Uncropped data for supplementary Figure 5.

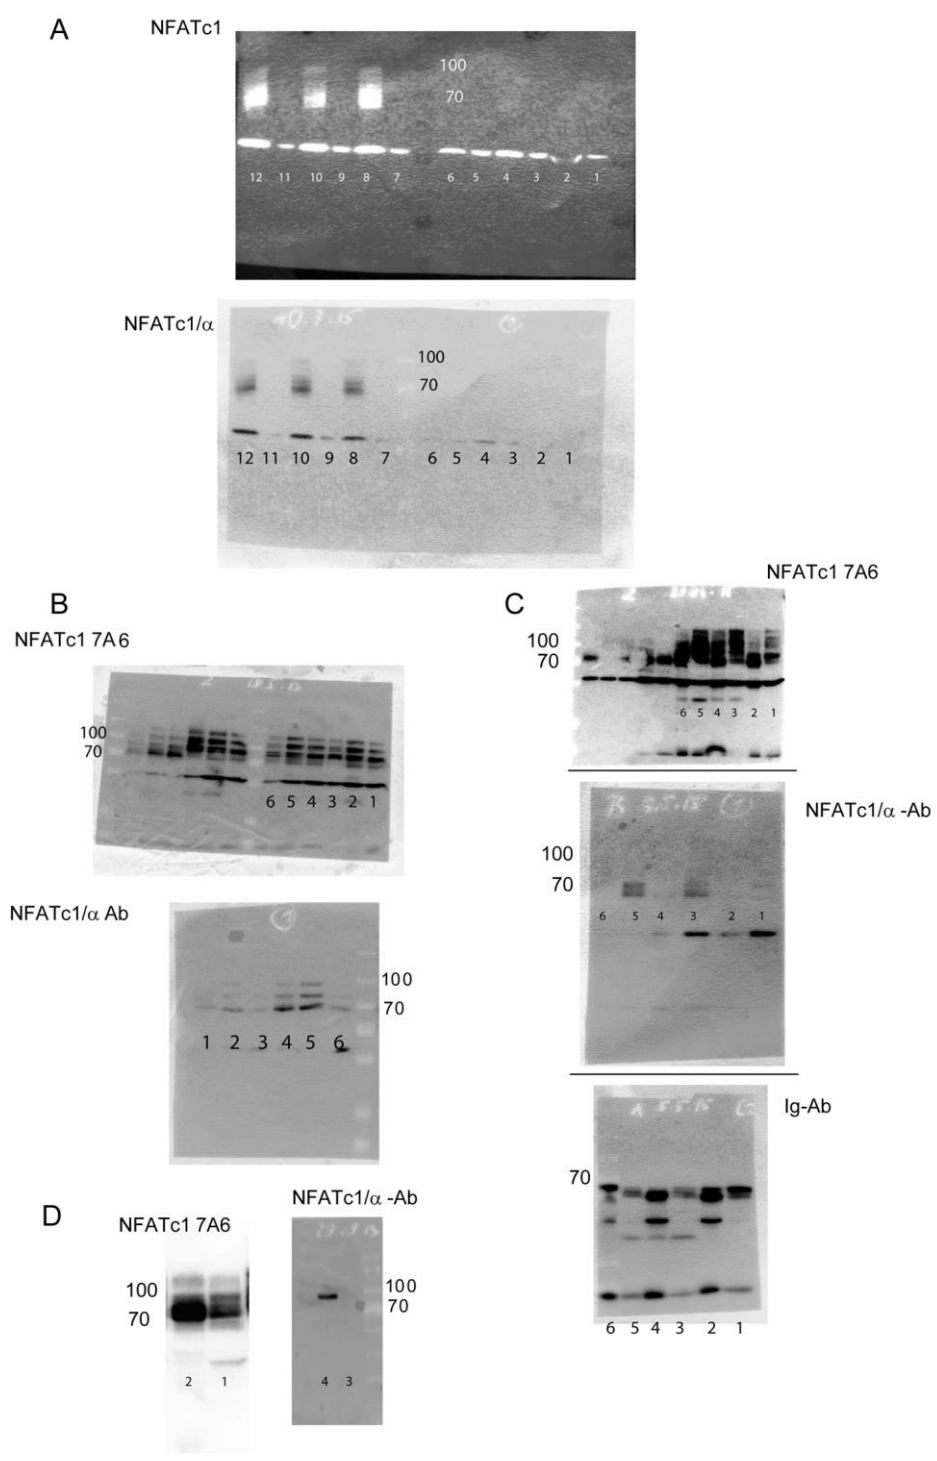

**Supplementary Figure 12.** Uncropped data for supplementary Figure 7.

**Supplementary Table 1. Proteins associated with NFATc1/A-bio in WEHI 231 B cells.** Shown are proteins that were sequenced in 6 independent MS assays.

| UniProtKB-Nr.                              | Gene Symbol    | Protein name                                                                       | No. of unique peptides | Coverage |
|--------------------------------------------|----------------|------------------------------------------------------------------------------------|------------------------|----------|
| <b>Calcineurin Components/Phosphatases</b> |                |                                                                                    |                        |          |
| P48453                                     | <i>Ppp3cb</i>  | Protein phosphatase 3, calcineurin, cat. subunit $\beta$                           | 13                     | 31,43    |
| Q63810                                     | <i>Ppp3r1</i>  | Protein phosphatase 3, calcineurin, reg. subunit 1                                 | 3                      | 22,94    |
| Q6P1F6                                     | <i>Ppp2r2a</i> | Protein phosphatase 2, regulatory subunit B, $\alpha$                              | 6                      | 13,87    |
| <b>Protein Kinases</b>                     |                |                                                                                    |                        |          |
| P11440                                     | <i>Cdk1</i>    | Cyclin-dependent kinase 1                                                          | 3                      | 16,16    |
| Q07832                                     | <i>Plk1</i>    | Polo-like kinase 1                                                                 | 10                     | 21,89    |
| Q9R0N0                                     | <i>Galk1</i>   | Galactokinase 1                                                                    | 5                      | 13,78    |
| Q9D7G0                                     | <i>Prps1</i>   | Phosphoribosyl pyrophosphate synthetase 1                                          | 8                      | 38,68    |
| P70218                                     | <i>Map4k1</i>  | Mitogen-activated protein kinase kinase kinase kinase 1                            | 4                      | 5,68     |
| O70126                                     | <i>Aurkb</i>   | Aurora kinase B                                                                    | 9                      | 31,88    |
| <b>Cytoskeleton/Scaffold/Adapters</b>      |                |                                                                                    |                        |          |
| Q61033                                     | <i>Tmpos1</i>  | Thymopoietin                                                                       | 18                     | 34,63    |
| P61161                                     | <i>Actr2</i>   | Actin-related protein 2                                                            | 5                      | 26,14    |
| Q99JY9                                     | <i>Actr3</i>   | Actin-related protein 3                                                            | 8                      | 25,6     |
| Q922F4                                     | <i>Tubb6</i>   | Tubulin beta-6 class V                                                             | 12                     | 41,16    |
| P61963                                     | <i>Dcaf7</i>   | DDB1 and CUL4 associated factor 7                                                  | 2                      | 8,19     |
| P62259                                     | <i>Ywhae</i>   | Tyrosine 3-monooxygenase/tryptophan 5-monooxygenase activation protein, $\epsilon$ | 7                      | 37,65    |
| Q9R0L6                                     | <i>Pcm1</i>    | Pericentriolar material 1 protein                                                  | 23                     | 17,23    |
| Q80YR5                                     | <i>Safb2</i>   | Scaffold attachment factor B2                                                      | 5                      | 7,57     |
| Q61897                                     | <i>Krt33b</i>  | Keratin 33b                                                                        | 8                      | 29,7     |
| Q9JIF0                                     | <i>Prmt1</i>   | Protein arginine N-methyltransferase 1                                             | 8                      | 26,42    |



**Splicing/Polyadenylation**

|        |                |                                             |    |       |
|--------|----------------|---------------------------------------------|----|-------|
| P29341 | <i>Pabpc1</i>  | Polyadenylate-binding protein 1             | 13 | 31,92 |
| Q99LF4 | <i>Rtcb</i>    | RNA 2',3'-cyclic phosphate and 5'-OH ligase | 7  | 16,63 |
| Q9D883 | <i>U2af1</i>   | Splicing factor U2AF 35 kDa subunit         | 3  | 14,23 |
| Q99KP6 | <i>Prpf19</i>  | Pre-mRNA-processing factor 19               | 5  | 12,5  |
| Q9CX86 | <i>Hnrnpa0</i> | Heterogeneous nuclear ribonucleoprotein A0  | 3  | 12,46 |
| Q3U0V1 | <i>Khsrp</i>   | KH-type splicing regulatory protein         | 8  | 13,1  |
| Q8R326 | <i>Pspc1</i>   | Paraspeckle protein 1                       | 6  | 12,05 |
| P84089 | <i>Erh</i>     | Enhancer of rudimentary homolog             | 2  | 42,31 |

**Ribosomal Proteins/Ribosome**

|        |               |                                                  |    |       |
|--------|---------------|--------------------------------------------------|----|-------|
| P62908 | <i>Rps3</i>   | Ribosomal protein S3                             | 11 | 62,14 |
| P62281 | <i>Rps11</i>  | Ribosomal protein S11                            | 8  | 62,03 |
| P63323 | <i>Rps12</i>  | Ribosomal protein S12                            | 3  | 20,45 |
| P62245 | <i>Rps15a</i> | Ribosomal protein S15a                           | 4  | 23,08 |
| P62267 | <i>Rps23</i>  | Ribosomal protein S23                            | 3  | 19,58 |
| P62855 | <i>Rps26</i>  | Ribosomal protein S26                            | 2  | 20,87 |
| P35979 | <i>Rpl12</i>  | Ribosomal protein L12                            | 5  | 43,03 |
| P84099 | <i>Rpl19</i>  | Ribosomal protein L19                            | 2  | 11,73 |
| Q8BP67 | <i>Rpl24</i>  | Ribosomal protein L24                            | 4  | 33,12 |
| P62889 | <i>Rpl30</i>  | Ribosomal protein L30                            | 3  | 29,57 |
| O35130 | <i>Emg1</i>   | EMG1 N1-specific pseudouridine methyltransferase | 9  | 50,82 |
| Q9EQ61 | <i>Pes1</i>   | Pescadillo homolog 1, containing BRCT domain     | 6  | 10,45 |

**Protein Synthesis**

|        |               |                                                       |    |       |
|--------|---------------|-------------------------------------------------------|----|-------|
| O70194 | <i>Eif3d</i>  | Eukaryotic translation initiation factor 3, subunit D | 7  | 14,96 |
| Q91VC3 | <i>Eif4a3</i> | Eukaryotic translation initiation factor 4A3          | 13 | 34,31 |
| Q9D8N0 | <i>Eef1g</i>  | Eukaryotic translation elongation factor 1 $\gamma$   | 12 | 24,94 |
| Q9Z1Q9 | <i>Vars</i>   | Valyl-tRNA synthetase                                 | 26 | 25,18 |

**RNA Binding/Export**

|        |              |                              |   |       |
|--------|--------------|------------------------------|---|-------|
| Q9CWZ3 | <i>Rbm8a</i> | RNA binding motif protein 8a | 2 | 15,52 |
| Q8C570 | <i>Rae1</i>  | RAE1 RNA export 1 homolog    | 5 | 12,77 |

|                                       |                |                                                                  |    |       |
|---------------------------------------|----------------|------------------------------------------------------------------|----|-------|
| Q8R2U0                                | <i>Seh1l</i>   | SEH1-like ( <i>S. cerevisiae</i> )                               | 2  | 12,5  |
| Q91VR5                                | <i>Ddx1</i>    | DEAD (Asp-Glu-Ala-Asp) box polypeptide 1                         | 18 | 34,46 |
| <b>Nuclear/Membrane Import/Export</b> |                |                                                                  |    |       |
| P46061                                | <i>Rangap1</i> | RAN GTPase-activating protein 1                                  | 17 | 33,45 |
| Q8BKC5                                | <i>Ipo5</i>    | Importin 5                                                       | 8  | 14,59 |
| Q9JIH2                                | <i>Nup50</i>   | Nucleoporin 50                                                   | 11 | 33,69 |
| P70168                                | <i>Kpnb1</i>   | Karyopherin (importin) beta 1                                    | 13 | 19,63 |
| Q6P5F9                                | <i>Xpo1</i>    | Exportin 1                                                       | 21 | 27,17 |
| P61222                                | <i>Abce1</i>   | ATP-binding cassette, sub-family E (OABP), member 1              | 12 | 25,04 |
| <b>Transcription Factors</b>          |                |                                                                  |    |       |
| P56477                                | <i>Irf5</i>    | Interferon regulatory factor 5                                   | 7  | 20,93 |
| Q9WTK5                                | <i>Nfkb2</i>   | NF-kB2, p52/p100                                                 | 2  | 2,78  |
| Q99K48                                | <i>Nono</i>    | Non-POU domain-containing octamer-binding protein                | 5  | 11,42 |
| Q921F2                                | <i>Tardbp</i>  | TAR DNA binding protein                                          | 6  | 19,57 |
| Q64287                                | <i>Irf4</i>    | Interferon regulatory factor 4                                   | 10 | 29,56 |
| Q8BFT2                                | <i>Haus4</i>   | HAUS augmin-like complex, subunit 4                              | 10 | 26,45 |
| <b>Transcription/Chromatin</b>        |                |                                                                  |    |       |
| O09106                                | <i>Hdac1</i>   | Histone deacetylase 1                                            | 5  | 9,54  |
| Q62318                                | <i>Trim28</i>  | Tripartite motif-containing 28                                   | 8  | 14,51 |
| Q9JIX8                                | <i>Acin1</i>   | Apoptotic chromatin condensation inducer 1                       | 9  | 8,74  |
| Q8BY71                                | <i>Hat1</i>    | Histone aminotransferase 1                                       | 3  | 9,13  |
| O35381                                | <i>Anp32a</i>  | Acidic (leucine-rich) nuclear phosphoprotein 32, family member A | 5  | 26,32 |
| <b>Signalling</b>                     |                |                                                                  |    |       |
| P63001                                | <i>Rac1</i>    | RAS-related C3 botulinum substrate 1                             | 4  | 19,79 |
| Q05144                                | <i>Rac2</i>    | RAS-related C3 botulinum substrate 2                             | 3  | 15,62 |
| P27870                                | <i>Vav1</i>    | Vav 1 oncogene                                                   | 15 | 20,00 |
| Q9CQM9                                | <i>Glrx3</i>   | Glutaredoxin 3                                                   | 6  | 29,08 |
| P68040                                | <i>Rack1</i>   | Receptor for activated C kinase 1                                | 14 | 62,15 |
| <b>Metabolism</b>                     |                |                                                                  |    |       |
| P06151                                | <i>Ldha</i>    | Lactate dehydrogenase A                                          | 10 | 30,72 |

|                                                         |                |                                                                             |    |       |
|---------------------------------------------------------|----------------|-----------------------------------------------------------------------------|----|-------|
| Q61753                                                  | <i>Phgdh</i>   | 3-phosphoglycerate dehydrogenase                                            | 14 | 37,9  |
| P12382                                                  | <i>Pfkl</i>    | Phosphofructokinase, liver, B-type                                          | 13 | 23,08 |
| Q9JLJ2                                                  | <i>Aldh9a1</i> | Aldehyde dehydrogenase 9 subfamily A1                                       | 2  | 7,09  |
| Q3THK7                                                  | <i>Gmps</i>    | Guanine monophosphate synthetase                                            | 9  | 15,73 |
| <b>Ubiquitylation/Sumoylation</b>                       |                |                                                                             |    |       |
| P46935                                                  | <i>Nedd4</i>   | Neural precursor cell expressed, developmentally down-regulated 4           | 16 | 23,90 |
| Q8CFI0                                                  | <i>Nedd4l</i>  | Neural precursor cell expressed, developmentally down-regulated gene 4-like | 2  | 2,89  |
| <b>DNA replication/Chromosome structure</b>             |                |                                                                             |    |       |
| P25206                                                  | <i>Mcm3</i>    | Minichromosome maintenance deficient 3                                      | 13 | 18,72 |
| P49717                                                  | <i>Mcm4</i>    | Minichromosome maintenance deficient 4 homolog                              | 10 | 14,27 |
| P49718                                                  | <i>Mcm5</i>    | Minichromosome maintenance deficient 5, cell division cycle 46              | 15 | 25,24 |
| Q61881                                                  | <i>Mcm7</i>    | Minichromosome maintenance deficient 7                                      | 11 | 21,70 |
| Q8BG81                                                  | <i>Poldip3</i> | Polymerase delta-interacting protein 3                                      | 4  | 14,76 |
| Q9CU62                                                  | <i>Smc1a</i>   | Structural maintenance of chromosomes 1A                                    | 7  | 6,08  |
| Q8BK67                                                  | <i>Rcc2</i>    | Regulator of chromosome condensation 2                                      | 14 | 38,08 |
| P17918                                                  | <i>Pcna</i>    | Proliferating cell nuclear antigen                                          | 2  | 5,75  |
| Q810D6                                                  | <i>Grwd1</i>   | Glutamate-rich WD repeat-containing 1                                       | 3  | 8,74  |
| <b>Heat shock/Stress factors/Chaperonins/Proteosome</b> |                |                                                                             |    |       |
| Q9QYI3                                                  | <i>Dnajc7</i>  | DnaJ heat shock protein family (Hsp40) member C7                            | 7  | 19,84 |
| Q61699                                                  | <i>Hsph1</i>   | Heat shock 105kDa/110kDa protein 1                                          | 12 | 21,79 |
| P11983                                                  | <i>Tcp1</i>    | T-complex protein 1                                                         | 12 | 33,81 |
| P80318                                                  | <i>Cct3</i>    | Chaperonin containing Tcp1, subunit 3 (gamma)                               | 10 | 21,83 |
| P80316                                                  | <i>Cct5</i>    | Chaperonin containing Tcp1, subunit 5 (epsilon)                             | 9  | 18,67 |
| P80317                                                  | <i>Cct6a</i>   | Chaperonin containing Tcp1, subunit 6a (zeta)                               | 16 | 33,33 |
| P80313                                                  | <i>Cct7</i>    | Chaperonin containing Tcp1, subunit 7 (eta)                                 | 5  | 16,36 |
| P42932                                                  | <i>Cct8</i>    | Chaperonin containing Tcp1, subunit 8 (theta)                               | 14 | 31,02 |
| P62334                                                  | <i>Psmc6</i>   | Proteasome (prosome, macropain) 26S subunit, ATPase, 6                      | 10 | 30,08 |
| <b>Miscellaneous</b>                                    |                |                                                                             |    |       |
| Q61584                                                  | <i>Fxr1</i>    | Fragile X mental retardation gene 1, autosomal homolog                      | 8  | 19,35 |

|        |                  |                                                                         |    |       |
|--------|------------------|-------------------------------------------------------------------------|----|-------|
| P70698 | <i>Ctps1</i>     | Cytidine 5'-triphosphate synthase 1                                     | 9  | 17,26 |
| Q80SW1 | <i>Ahcy1</i>     | S-adenosylhomocysteine hydrolase-like 1                                 | 21 | 39,62 |
| P34884 | <i>Mif</i>       | Macrophage migration inhibitory factor                                  | 3  | 35,65 |
| Q3V3R1 | <i>Mthfd1l</i>   | Methylenetetrahydrofolate dehydrogenase (NADP+ dependent) 1-like        | 9  | 11,16 |
| Q64737 | <i>Gart</i>      | Phosphoribosylglycinamide formyltransferase                             | 21 | 33,96 |
| Q9D1M0 | <i>Sec13</i>     | SEC13 homolog, nuclear pore and COPII coat complex component            | 4  | 23,91 |
| Q9R0Q7 | <i>Ptges3</i>    | Prostaglandin E synthase 3 (cytosolic)                                  | 4  | 38,12 |
| Q9DCL9 | <i>Paics</i>     | Phosphoribosylaminoimidazole carboxylase, succinocarboxamide synthetase | 12 | 32,94 |
| O70325 | <i>Gpx4</i>      | Glutathione peroxidase 4                                                | 5  | 26,4  |
| P17751 | <i>Tpi1</i>      | Triosephosphate isomerase 1                                             | 7  | 42,47 |
| Q9CQE8 | <i>C14orf166</i> | Chromosome 14 open reading frame 166                                    | 6  | 33,61 |
| P50431 | <i>Shmt1</i>     | Serine hydroxymethyltransferase 1                                       | 8  | 27,2  |
| Q91VI7 | <i>Rnh1</i>      | Ribonuclease/angiogenin inhibitor 1                                     | 12 | 40,35 |

## References:

1. Nojima, T., *et al.* In-vitro derived germinal centre B cells differentially generate memory B or plasma cells in vivo. *Nat Commun* **2**, 465 (2011)
